# Supplementary material for: Layered germanium tin antimony tellurides: element distribution, nanostructures and thermoelectric properties
Source: Royal Society of Chemistry journal article supplement (doi:10.1039/c4dt00336e), 2014-01-01
Supplement: c4dt00336e4.pdf [file c4dt00336e4.pdf]

## Supplementary Information for

### Layered germanium tin antimony tellurides: element distribution, nanostructures and thermoelectric properties

Simon Welzmler,<sup>a</sup> Tobias Rosenthal,<sup>b</sup> Pirmin Ganter,<sup>b</sup>  
Lukas Neudert,<sup>b</sup> Felix Fahrnbauer,<sup>a</sup> Philipp Urban,<sup>a</sup>  
Christian Stiewe,<sup>c</sup> Johannes de Boor<sup>c</sup> and Oliver Oeckler<sup>\*a</sup>

[a] Leipzig University, Faculty of Chemistry and Mineralogy, Scharnhorststr. 20,  
D-04275 Leipzig, Germany

[b] Ludwig Maximilian University, Department of Chemistry, Butenandtstr. 5-13,  
D-81377 Munich, Germany

[c] German Aerospace Center, Linder Höhe, D-51147 Cologne, Germany

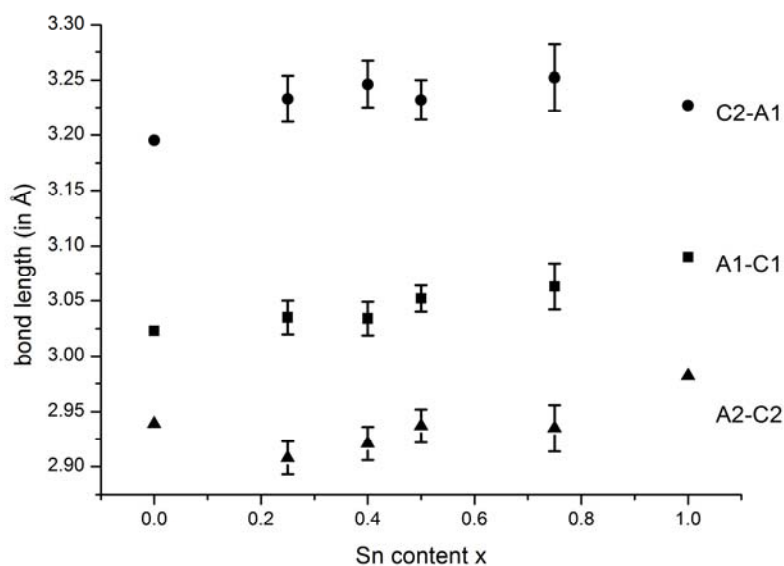

**Figure S1:** Trend of the cation-anion bond lengths (labelling cf. Fig. 4) with increasing Sn content  $x$ ; error bars correspond to 3 standard deviations; bond lengths for  $\text{GeSb}_2\text{Te}_4$  and  $\text{SnSb}_2\text{Te}_4$  taken from literature (refs. [20] and [22]).

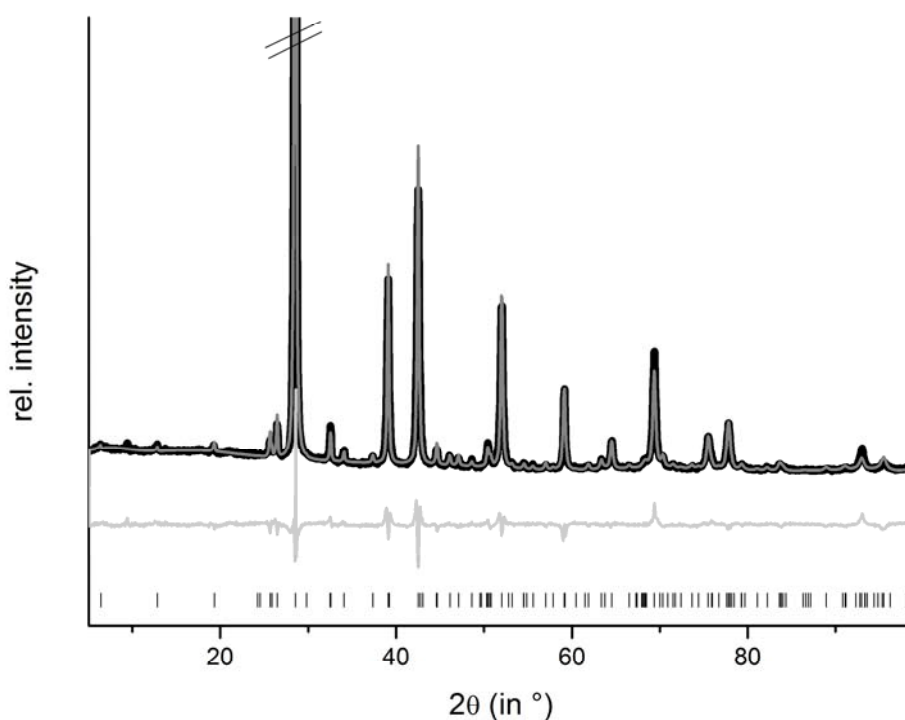

**Figure S2:** Rietveld refinement of  $21R\text{-Ge}_{0.75}\text{Sn}_{0.25}\text{Sb}_2\text{Te}_4$  (the strongest reflection is cut off); vertical lines indicate calculated reflection positions, experimental (black) and calculated pattern (gray) and difference plot (below) are shown.

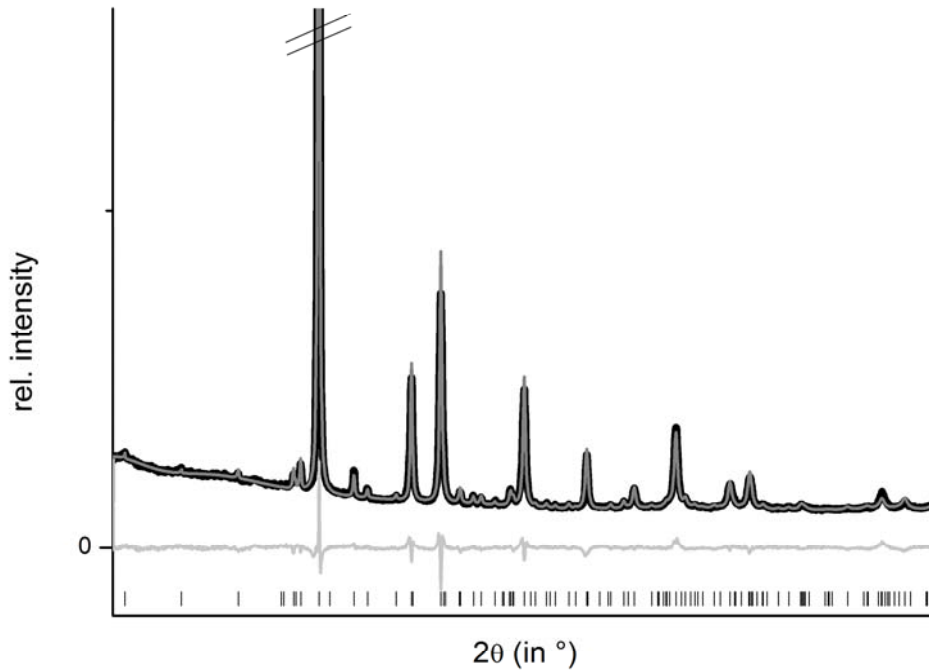

**Figure S3:** Rietveld refinement of 21R-Ge<sub>0.6</sub>Sn<sub>0.4</sub>Sb<sub>2</sub>Te<sub>4</sub> (the strongest reflection is cut off); vertical lines indicate calculated reflection positions, experimental (black) and calculated pattern (gray) and difference plot (below) are shown.

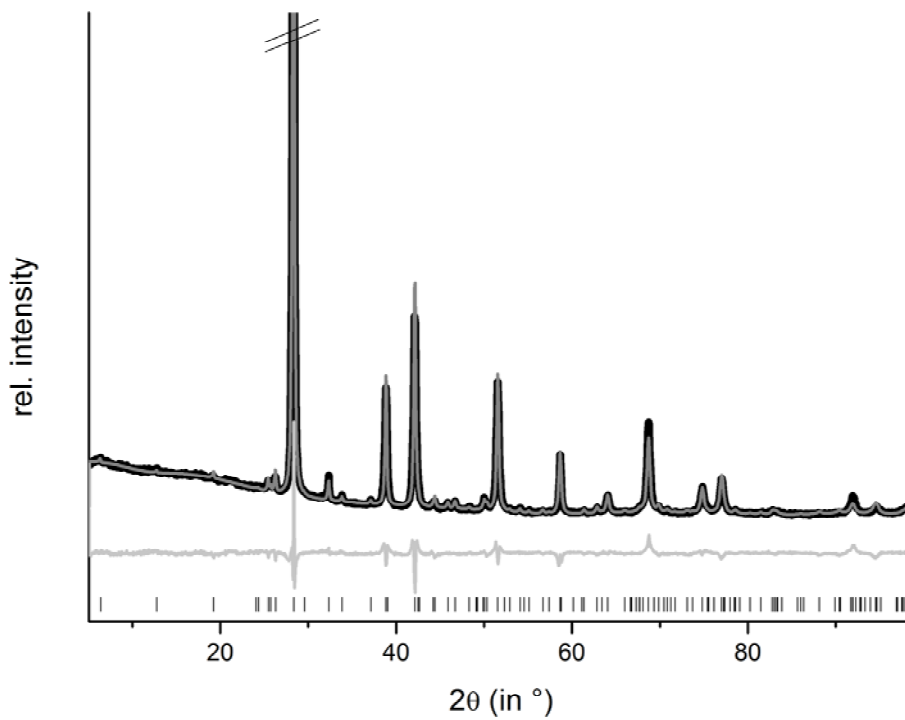

**Figure S4:** Rietveld refinement of 21R-Ge<sub>0.25</sub>Sn<sub>0.75</sub>Sb<sub>2</sub>Te<sub>4</sub> (the strongest reflection is cut off); vertical lines indicate calculated reflection positions, experimental (black) and calculated pattern (gray) and difference plot (below) are shown.

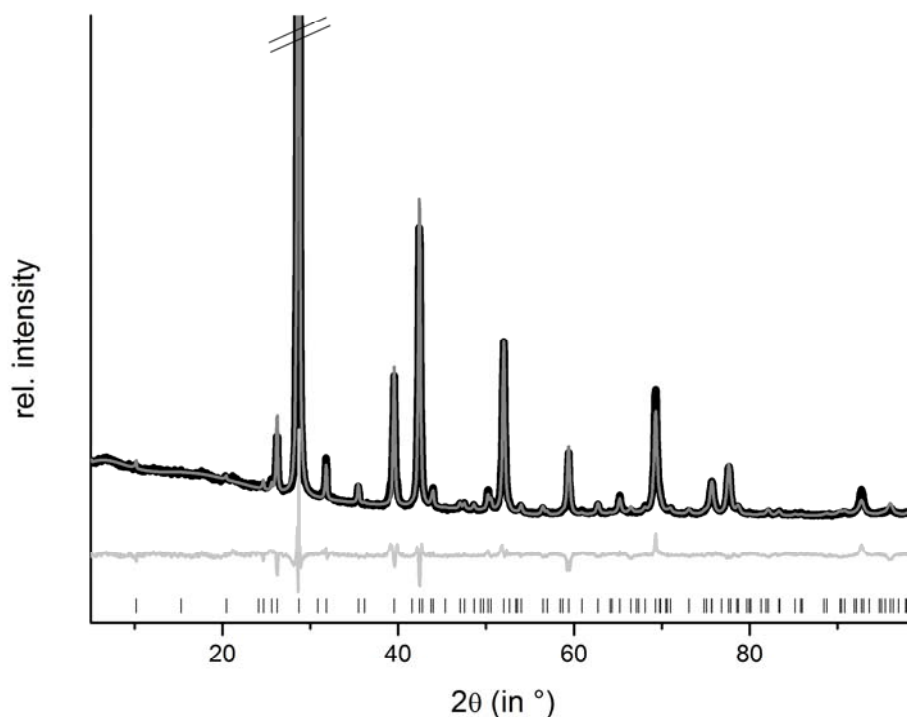

**Figure S5:** Rietveld refinement of  $9P\text{-Ge}_{1.3}\text{Sn}_{0.7}\text{Sb}_2\text{Te}_5$ ; (the strongest reflection is cut off); vertical lines indicate calculated reflection positions, experimental (black) and calculated pattern (gray) and difference plot (below) are shown

**Table S1:** Specific annealing conditions of samples used for structure determination by Rietveld refinement; note that the exact temperatures and annealing times have little influence on the powder diffraction patterns and that many more samples with almost the same diffraction patterns were obtained at slightly different conditions.

| Formula                                                  | Annealing time (in h) | Temperature (in °C) |
|----------------------------------------------------------|-----------------------|---------------------|
| $\text{Ge}_{0.75}\text{Sn}_{0.25}\text{Sb}_2\text{Te}_4$ | 46                    | 560                 |
| $\text{Ge}_{0.6}\text{Sn}_{0.4}\text{Sb}_2\text{Te}_4$   | 144                   | 540                 |
| $\text{Ge}_{0.5}\text{Sn}_{0.5}\text{Sb}_2\text{Te}_4$ * | 20                    | 550                 |
| $\text{Ge}_{0.25}\text{Sn}_{0.75}\text{Sb}_2\text{Te}_4$ | 46                    | 560                 |
| $\text{Ge}_{1.3}\text{Sn}_{0.7}\text{Sb}_2\text{Te}_5$   | 46                    | 490                 |
| $\text{GeSnSb}_2\text{Te}_5$                             | 39                    | 570                 |

\* The TEM-EDX measurements for  $\text{Ge}_{0.5}\text{Sn}_{0.5}\text{Sb}_2\text{Te}_4$  were done with a sample that was annealed at 620 °C for 72 h and subsequently at 590 °C for 120 h.
